# Supplementary material
Source: PubMed Central journal article supplement (PMC3976440)
Supplement: NIHMS461146-supplement-01.pdf [file NIHMS461146-supplement-01.pdf]

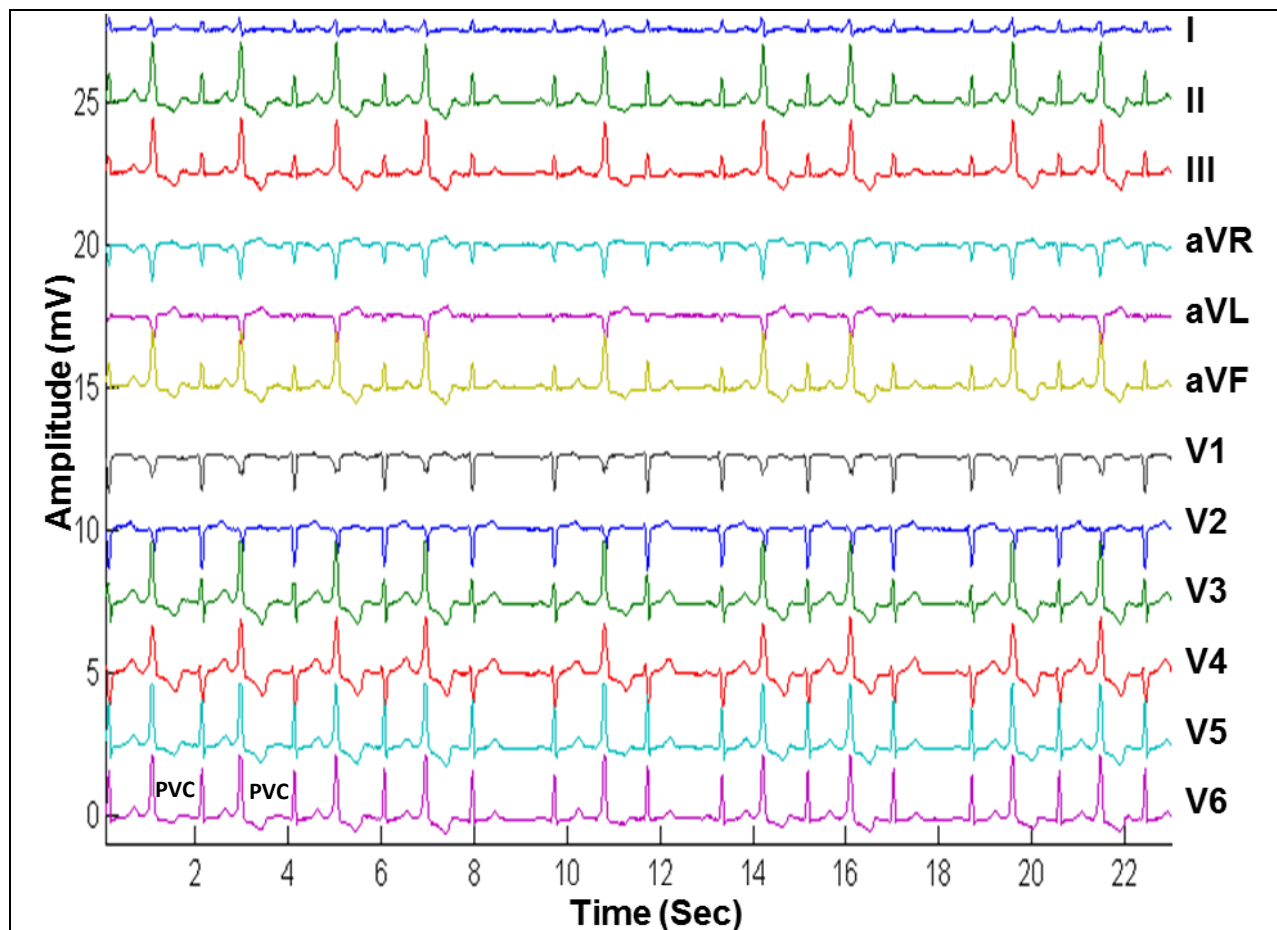

Supplemental Figure 1. Unprocessed 12-lead ECG of the IOT PVC patient obtained outside the MRI bore. The first two PVC Bigeminy beats are labeled.
